# Supplementary material for: Establishing strength prediction models for low-carbon rubberized cementitious mortar using advanced AI tools
Source: publisher site journal article supplement (doi:10.1515/rams-2025-0135), 2025-01-01
Supplement: Supplementary file 1 [file rams-2025-0135_sm.xlsx]

## Sheet: A2
Article Title: Establishing strength prediction models for low-carbon rubberized cementitious mortar using advanced AI tools
Journal: Reviews on Advanced Materials Science
Source of data: https://doi.org/10.1515/rams-2024-0081
Cement (kg/m3)	Sand (kg/m3)	Rubber (kg/m3)	Silica fume (kg/m3)	Marble powder (kg/m3)	Glass powder (kg/m3)	Compressive strength (MPa)
825	1240	0	0	0	0	48.15
825	1240	0	0	0	0	47.34
825	1240	0	0	0	0	48.51
825	1178	62	0	0	0	38.56
825	1178	62	0	0	0	39.98
825	1178	62	0	0	0	40.26
825	1116	124	0	0	0	34.66
825	1116	124	0	0	0	36.13
825	1116	124	0	0	0	35.41
825	1054	186	0	0	0	33.25
825	1054	186	0	0	0	32.78
825	1054	186	0	0	0	31.77
825	992	248	0	0	0	30.16
825	992	248	0	0	0	29.27
825	992	248	0	0	0	29.37
825	930	310	0	0	0	24.45
825	930	310	0	0	0	25.6
825	930	310	0	0	0	24.95
783.75	1178	62	41.25	0	0	39.75
783.75	1178	62	41.25	0	0	40.8
783.75	1178	62	41.25	0	0	41.25
742.5	1178	62	82.5	0	0	42.35
742.5	1178	62	82.5	0	0	41.96
742.5	1178	62	82.5	0	0	42.29
701.25	1178	62	123.75	0	0	43.58
701.25	1178	62	123.75	0	0	45.03
701.25	1178	62	123.75	0	0	44.14
660	1178	62	165	0	0	40.88
660	1178	62	165	0	0	41.45
660	1178	62	165	0	0	41.66
618.75	1178	62	206.25	0	0	40.1
618.75	1178	62	206.25	0	0	38.78
618.75	1178	62	206.25	0	0	39.32
783.75	1116	124	41.25	0	0	35.9
783.75	1116	124	41.25	0	0	36.35
783.75	1116	124	41.25	0	0	36.95
742.5	1116	124	82.5	0	0	38.43
742.5	1116	124	82.5	0	0	37.92
742.5	1116	124	82.5	0	0	39.15
701.25	1116	124	123.75	0	0	40.5
701.25	1116	124	123.75	0	0	42.2
701.25	1116	124	123.75	0	0	42.7
660	1116	124	165	0	0	38.25
660	1116	124	165	0	0	37.14
660	1116	124	165	0	0	38.58
618.75	1116	124	206.25	0	0	35.1
618.75	1116	124	206.25	0	0	34.65
618.75	1116	124	206.25	0	0	33.762
783.75	1054	186	41.25	0	0	32.85
783.75	1054	186	41.25	0	0	33.61
783.75	1054	186	41.25	0	0	34.34
742.5	1054	186	82.5	0	0	37.9
742.5	1054	186	82.5	0	0	36.5
742.5	1054	186	82.5	0	0	37.5
701.25	1054	186	123.75	0	0	37.87
701.25	1054	186	123.75	0	0	39.12
701.25	1054	186	123.75	0	0	38.51
660	1054	186	165	0	0	36.75
660	1054	186	165	0	0	35.55
660	1054	186	165	0	0	35.7
618.75	1054	186	206.25	0	0	33.09
618.75	1054	186	206.25	0	0	32.23
618.75	1054	186	206.25	0	0	32.015
783.75	992	248	41.25	0	0	29.76
783.75	992	248	41.25	0	0	31.02
783.75	992	248	41.25	0	0	30.12
742.5	992	248	82.5	0	0	33.87
742.5	992	248	82.5	0	0	32.96
742.5	992	248	82.5	0	0	33.07
701.25	992	248	123.75	0	0	34.9
701.25	992	248	123.75	0	0	33.76
701.25	992	248	123.75	0	0	34.24
660	992	248	165	0	0	32.72
660	992	248	165	0	0	33.56
660	992	248	165	0	0	33.77
618.75	992	248	206.25	0	0	29.17
618.75	992	248	206.25	0	0	28.22
618.75	992	248	206.25	0	0	27.906
783.75	930	310	41.25	0	0	27.8
783.75	930	310	41.25	0	0	27.12
783.75	930	310	41.25	0	0	26.68
742.5	930	310	82.5	0	0	27.65
742.5	930	310	82.5	0	0	28.9
742.5	930	310	82.5	0	0	28.95
701.25	930	310	123.75	0	0	30.3
701.25	930	310	123.75	0	0	29.07
701.25	930	310	123.75	0	0	29.43
660	930	310	165	0	0	26.77
660	930	310	165	0	0	27.55
660	930	310	165	0	0	28.18
618.75	930	310	206.25	0	0	24.02
618.75	930	310	206.25	0	0	23.09
618.75	930	310	206.25	0	0	23.39
783.75	1178	62	0	41.25	0	40.55
783.75	1178	62	0	41.25	0	41.1
783.75	1178	62	0	41.25	0	39.55
742.5	1178	62	0	82.5	0	42.82
742.5	1178	62	0	82.5	0	41.9
742.5	1178	62	0	82.5	0	41.88
701.25	1178	62	0	123.75	0	40.6
701.25	1178	62	0	123.75	0	41.45
701.25	1178	62	0	123.75	0	41.55
660	1178	62	0	165	0	39.93
660	1178	62	0	165	0	38.74
660	1178	62	0	165	0	39.32
618.75	1178	62	0	206.25	0	35.79
618.75	1178	62	0	206.25	0	36.75
618.75	1178	62	0	206.25	0	36.96
783.75	1116	124	0	41.25	0	37
783.75	1116	124	0	41.25	0	36.35
783.75	1116	124	0	41.25	0	37.05
742.5	1116	124	0	82.5	0	39.1
742.5	1116	124	0	82.5	0	37.67
742.5	1116	124	0	82.5	0	38.73
701.25	1116	124	0	123.75	0	38.2
701.25	1116	124	0	123.75	0	37.04
701.25	1116	124	0	123.75	0	38.16
660	1116	124	0	165	0	37.4
660	1116	124	0	165	0	36.14
660	1116	124	0	165	0	36.56
618.75	1116	124	0	206.25	0	33.55
618.75	1116	124	0	206.25	0	32.94
618.75	1116	124	0	206.25	0	34.01
783.75	1054	186	0	41.25	0	32.95
783.75	1054	186	0	41.25	0	33.48
783.75	1054	186	0	41.25	0	34.37
742.5	1054	186	0	82.5	0	36.75
742.5	1054	186	0	82.5	0	35.07
742.5	1054	186	0	82.5	0	34.98
701.25	1054	186	0	123.75	0	34.56
701.25	1054	186	0	123.75	0	34
701.25	1054	186	0	123.75	0	34.64
660	1054	186	0	165	0	33.38
660	1054	186	0	165	0	33.76
660	1054	186	0	165	0	34.26
618.75	1054	186	0	206.25	0	28.29
618.75	1054	186	0	206.25	0	27.14
618.75	1054	186	0	206.25	0	27.97
783.75	992	248	0	41.25	0	31.1
783.75	992	248	0	41.25	0	32.2
783.75	992	248	0	41.25	0	30.6
742.5	992	248	0	82.5	0	33.65
742.5	992	248	0	82.5	0	33.23
742.5	992	248	0	82.5	0	33.32
701.25	992	248	0	123.75	0	32.8
701.25	992	248	0	123.75	0	31.97
701.25	992	248	0	123.75	0	31.53
660	992	248	0	165	0	30.3
660	992	248	0	165	0	29.1
660	992	248	0	165	0	29.1
618.75	992	248	0	206.25	0	24.35
618.75	992	248	0	206.25	0	25.86
618.75	992	248	0	206.25	0	25.99
783.75	930	310	0	41.25	0	26.3
783.75	930	310	0	41.25	0	27.64
783.75	930	310	0	41.25	0	25.86
742.5	930	310	0	82.5	0	27.86
742.5	930	310	0	82.5	0	27.43
742.5	930	310	0	82.5	0	28.11
701.25	930	310	0	123.75	0	28.06
701.25	930	310	0	123.75	0	27.1
701.25	930	310	0	123.75	0	26.44
660	930	310	0	165	0	23.78
660	930	310	0	165	0	25.09
660	930	310	0	165	0	24.93
618.75	930	310	0	206.25	0	20.3
618.75	930	310	0	206.25	0	21.45
618.75	930	310	0	206.25	0	20.65
783.75	1178	62	0	0	41.25	39.98
783.75	1178	62	0	0	41.25	40.16
783.75	1178	62	0	0	41.25	39.56
742.5	1178	62	0	0	82.5	41.76
742.5	1178	62	0	0	82.5	41.03
742.5	1178	62	0	0	82.5	41.5
701.25	1178	62	0	0	123.75	42.59
701.25	1178	62	0	0	123.75	43.34
701.25	1178	62	0	0	123.75	43.37
660	1178	62	0	0	165	38.65
660	1178	62	0	0	165	37.78
660	1178	62	0	0	165	37.57
618.75	1178	62	0	0	206.25	34.51
618.75	1178	62	0	0	206.25	33.67
618.75	1178	62	0	0	206.25	33.82
783.75	1116	124	0	0	41.25	38
783.75	1116	124	0	0	41.25	37.26
783.75	1116	124	0	0	41.25	38.44
742.5	1116	124	0	0	82.5	39.54
742.5	1116	124	0	0	82.5	39.1
742.5	1116	124	0	0	82.5	38.36
701.25	1116	124	0	0	123.75	40.77
701.25	1116	124	0	0	123.75	41.42
701.25	1116	124	0	0	123.75	42.1
660	1116	124	0	0	165	37.33
660	1116	124	0	0	165	36.43
660	1116	124	0	0	165	37.24
618.75	1116	124	0	0	206.25	34.4
618.75	1116	124	0	0	206.25	35.39
618.75	1116	124	0	0	206.25	35.81
783.75	1054	186	0	0	41.25	33.5
783.75	1054	186	0	0	41.25	34.5
783.75	1054	186	0	0	41.25	34
742.5	1054	186	0	0	82.5	36.47
742.5	1054	186	0	0	82.5	35.56
742.5	1054	186	0	0	82.5	35.49
701.25	1054	186	0	0	123.75	37.33
701.25	1054	186	0	0	123.75	36.58
701.25	1054	186	0	0	123.75	37.42
660	1054	186	0	0	165	33.1
660	1054	186	0	0	165	32.45
660	1054	186	0	0	165	34.467
618.75	1054	186	0	0	206.25	30.32
618.75	1054	186	0	0	206.25	30.98
618.75	1054	186	0	0	206.25	29.99
783.75	992	248	0	0	41.25	30.74
783.75	992	248	0	0	41.25	31.3
783.75	992	248	0	0	41.25	31.38
742.5	992	248	0	0	82.5	32.96
742.5	992	248	0	0	82.5	32
742.5	992	248	0	0	82.5	31.52
701.25	992	248	0	0	123.75	32.47
701.25	992	248	0	0	123.75	33.13
701.25	992	248	0	0	123.75	33.4
660	992	248	0	0	165	27.4
660	992	248	0	0	165	26.45
660	992	248	0	0	165	27.42
618.75	992	248	0	0	206.25	25.55
618.75	992	248	0	0	206.25	25
618.75	992	248	0	0	206.25	26.07
783.75	930	310	0	0	41.25	26.9
783.75	930	310	0	0	41.25	26.1
783.75	930	310	0	0	41.25	25.63
742.5	930	310	0	0	82.5	27.6
742.5	930	310	0	0	82.5	28.35
742.5	930	310	0	0	82.5	29.34
701.25	930	310	0	0	123.75	28.44
701.25	930	310	0	0	123.75	28.01
701.25	930	310	0	0	123.75	27.85
660	930	310	0	0	165	25.1
660	930	310	0	0	165	23.94
660	930	310	0	0	165	24.76
618.75	930	310	0	0	206.25	22.3
618.75	930	310	0	0	206.25	22.45
618.75	930	310	0	0	206.25	22.54
742.5	1178	62	41.25	41.25	0	41.02
742.5	1178	62	41.25	41.25	0	40.77
742.5	1178	62	41.25	41.25	0	41.57
660	1178	62	82.5	82.5	0	42.3
660	1178	62	82.5	82.5	0	42.75
660	1178	62	82.5	82.5	0	43.62
577.5	1178	62	123.75	123.75	0	39.45
577.5	1178	62	123.75	123.75	0	38.7
577.5	1178	62	123.75	123.75	0	38.79
742.5	1116	124	41.25	41.25	0	38
742.5	1116	124	41.25	41.25	0	37.7
742.5	1116	124	41.25	41.25	0	37.64
660	1116	124	82.5	82.5	0	40.44
660	1116	124	82.5	82.5	0	39.75
660	1116	124	82.5	82.5	0	40.5
577.5	1116	124	123.75	123.75	0	35.5
577.5	1116	124	123.75	123.75	0	36.55
577.5	1116	124	123.75	123.75	0	37
742.5	1054	186	41.25	41.25	0	35.15
742.5	1054	186	41.25	41.25	0	35.37
742.5	1054	186	41.25	41.25	0	34.96
660	1054	186	82.5	82.5	0	37.5
660	1054	186	82.5	82.5	0	37.98
660	1054	186	82.5	82.5	0	35.82
577.5	1054	186	123.75	123.75	0	33.43
577.5	1054	186	123.75	123.75	0	33.56
577.5	1054	186	123.75	123.75	0	33.51
742.5	992	248	41.25	41.25	0	32.98
742.5	992	248	41.25	41.25	0	32.15
742.5	992	248	41.25	41.25	0	32.91
660	992	248	82.5	82.5	0	35.1
660	992	248	82.5	82.5	0	35.12
660	992	248	82.5	82.5	0	34.81
577.5	992	248	123.75	123.75	0	28.16
577.5	992	248	123.75	123.75	0	29.02
577.5	992	248	123.75	123.75	0	28.86
742.5	930	310	41.25	41.25	0	26.2
742.5	930	310	41.25	41.25	0	26.92
742.5	930	310	41.25	41.25	0	26.53
660	930	310	82.5	82.5	0	28.78
660	930	310	82.5	82.5	0	29.17
660	930	310	82.5	82.5	0	28
577.5	930	310	123.75	123.75	0	22.34
577.5	930	310	123.75	123.75	0	23.12
577.5	930	310	123.75	123.75	0	22.34
742.5	1178	62	0	41.25	41.25	40.07
742.5	1178	62	0	41.25	41.25	40.76
742.5	1178	62	0	41.25	41.25	40.31
660	1178	62	0	82.5	82.5	42.32
660	1178	62	0	82.5	82.5	41.43
660	1178	62	0	82.5	82.5	41.23
577.5	1178	62	0	123.75	123.75	38.8
577.5	1178	62	0	123.75	123.75	38.65
577.5	1178	62	0	123.75	123.75	39.1
742.5	1116	124	0	41.25	41.25	38.18
742.5	1116	124	0	41.25	41.25	37.81
742.5	1116	124	0	41.25	41.25	37.5
660	1116	124	0	82.5	82.5	40.31
660	1116	124	0	82.5	82.5	40.03
660	1116	124	0	82.5	82.5	39.48
577.5	1116	124	0	123.75	123.75	36.15
577.5	1116	124	0	123.75	123.75	36.98
577.5	1116	124	0	123.75	123.75	36.67
742.5	1054	186	0	41.25	41.25	35.24
742.5	1054	186	0	41.25	41.25	34.48
742.5	1054	186	0	41.25	41.25	34.5
660	1054	186	0	82.5	82.5	38.14
660	1054	186	0	82.5	82.5	37.36
660	1054	186	0	82.5	82.5	37.81
577.5	1054	186	0	123.75	123.75	33.5
577.5	1054	186	0	123.75	123.75	33.01
577.5	1054	186	0	123.75	123.75	32.64
742.5	992	248	0	41.25	41.25	30.45
742.5	992	248	0	41.25	41.25	30.97
742.5	992	248	0	41.25	41.25	29.87
660	992	248	0	82.5	82.5	31.95
660	992	248	0	82.5	82.5	32.56
660	992	248	0	82.5	82.5	33.35
577.5	992	248	0	123.75	123.75	28.65
577.5	992	248	0	123.75	123.75	27.92
577.5	992	248	0	123.75	123.75	27.31
742.5	930	310	0	41.25	41.25	26.66
742.5	930	310	0	41.25	41.25	26.23
742.5	930	310	0	41.25	41.25	26.49
660	930	310	0	82.5	82.5	27.06
660	930	310	0	82.5	82.5	27.87
660	930	310	0	82.5	82.5	26.7
577.5	930	310	0	123.75	123.75	22.67
577.5	930	310	0	123.75	123.75	21.79
577.5	930	310	0	123.75	123.75	22.47
742.5	1178	62	41.25	0	41.25	41.2
742.5	1178	62	41.25	0	41.25	40.55
742.5	1178	62	41.25	0	41.25	40.95
660	1178	62	82.5	0	82.5	43.22
660	1178	62	82.5	0	82.5	43.59
660	1178	62	82.5	0	82.5	42.82
577.5	1178	62	123.75	0	123.75	37.76
577.5	1178	62	123.75	0	123.75	36.97
577.5	1178	62	123.75	0	123.75	36.84
742.5	1116	124	41.25	0	41.25	37.34
742.5	1116	124	41.25	0	41.25	36.56
742.5	1116	124	41.25	0	41.25	36.8
660	1116	124	82.5	0	82.5	41.04
660	1116	124	82.5	0	82.5	40.55
660	1116	124	82.5	0	82.5	40.63
577.5	1116	124	123.75	0	123.75	35.6
577.5	1116	124	123.75	0	123.75	35.14
577.5	1116	124	123.75	0	123.75	34.47
742.5	1054	186	41.25	0	41.25	34.77
742.5	1054	186	41.25	0	41.25	34.12
742.5	1054	186	41.25	0	41.25	34.64
660	1054	186	82.5	0	82.5	38.5
660	1054	186	82.5	0	82.5	37.9
660	1054	186	82.5	0	82.5	38.98
577.5	1054	186	123.75	0	123.75	33.86
577.5	1054	186	123.75	0	123.75	33.12
577.5	1054	186	123.75	0	123.75	33.55
742.5	992	248	41.25	0	41.25	33.17
742.5	992	248	41.25	0	41.25	33.76
742.5	992	248	41.25	0	41.25	33
660	992	248	82.5	0	82.5	35.56
660	992	248	82.5	0	82.5	35.72
660	992	248	82.5	0	82.5	34.35
577.5	992	248	123.75	0	123.75	29.56
577.5	992	248	123.75	0	123.75	29.12
577.5	992	248	123.75	0	123.75	28.47
742.5	930	310	41.25	0	41.25	27.87
742.5	930	310	41.25	0	41.25	28.61
742.5	930	310	41.25	0	41.25	27.97
660	930	310	82.5	0	82.5	30.98
660	930	310	82.5	0	82.5	31.17
660	930	310	82.5	0	82.5	30.19
577.5	930	310	123.75	0	123.75	23.74
577.5	930	310	123.75	0	123.75	23.03
577.5	930	310	123.75	0	123.75	23.73
701.25	1178	62	41.25	41.25	41.25	42.1
701.25	1178	62	41.25	41.25	41.25	41.65
701.25	1178	62	41.25	41.25	41.25	41.59
577.5	1178	62	82.5	82.5	82.5	39.04
577.5	1178	62	82.5	82.5	82.5	38.14
577.5	1178	62	82.5	82.5	82.5	39.07
701.25	1116	124	41.25	41.25	41.25	39.25
701.25	1116	124	41.25	41.25	41.25	38.36
701.25	1116	124	41.25	41.25	41.25	38.97
577.5	1116	124	82.5	82.5	82.5	34.78
577.5	1116	124	82.5	82.5	82.5	35.43
577.5	1116	124	82.5	82.5	82.5	35.15
701.25	1024	186	41.25	41.25	41.25	36.54
701.25	1024	186	41.25	41.25	41.25	36.43
701.25	1024	186	41.25	41.25	41.25	37.01
577.5	1024	186	82.5	82.5	82.5	31.5
577.5	1024	186	82.5	82.5	82.5	31.65
577.5	1024	186	82.5	82.5	82.5	31.29
701.25	992	248	41.25	41.25	41.25	33.67
701.25	992	248	41.25	41.25	41.25	33.12
701.25	992	248	41.25	41.25	41.25	33.59
577.5	992	248	82.5	82.5	82.5	27.75
577.5	992	248	82.5	82.5	82.5	27.26
577.5	992	248	82.5	82.5	82.5	27.88
701.25	920	310	41.25	41.25	41.25	27.65
701.25	920	310	41.25	41.25	41.25	27.45
701.25	920	310	41.25	41.25	41.25	26.83
577.5	920	310	82.5	82.5	82.5	22.45
577.5	920	310	82.5	82.5	82.5	22.59
577.5	920	310	82.5	82.5	82.5	22.46
